# Supplementary material for: Comprehensive analyses of the BES1 gene family in Brassica napus and examination of their evolutionary pattern in representative species
Source: PubMed Central journal article supplement (PMC5944053; doi:10.1186/s12864-018-4744-4), 2018-05-09

**Large-scale analyses of BES1 gene family reveal the distinct evolutionary patterns between  
*Brassicaceae* and *Poaceae* species**

Xiaoming Song<sup>1</sup>, Xiao Ma<sup>2</sup>, Chunjin Li<sup>1</sup>, Jingjing Hu<sup>1</sup>, Qihang Yang<sup>1</sup>, Tong Wang<sup>1</sup>, Li Wang<sup>1</sup>,  
Jinpeng Wang<sup>1</sup>, Di Guo<sup>1</sup>, Weina Ge<sup>1</sup>, Zhenyi Wang<sup>1</sup>, Lan Zhang<sup>1</sup>, Jiaqi Zhang<sup>1</sup>, Xiyin Wang<sup>1,\*</sup>

<sup>1</sup>Center of Genomics and Computational Biology, College of Life Sciences, North China  
University of Science and Technology, Tangshan, Hebei 063000, China.

<sup>2</sup>Library, North China University of Science and Technology, Tangshan, Hebei 063000, China.

**\*Corresponding author:** Xiyin Wang

**E-mail:** wang.xiyin@gmail.com

**Figure S1.** The positive selection analyses for each group of BES1 gene family in representative species. The  $\omega$  on the clades is dn/ds value under M8 model of codeml, which indicates the positive selection nodes.

# A1 group

★ Positive selection nodes

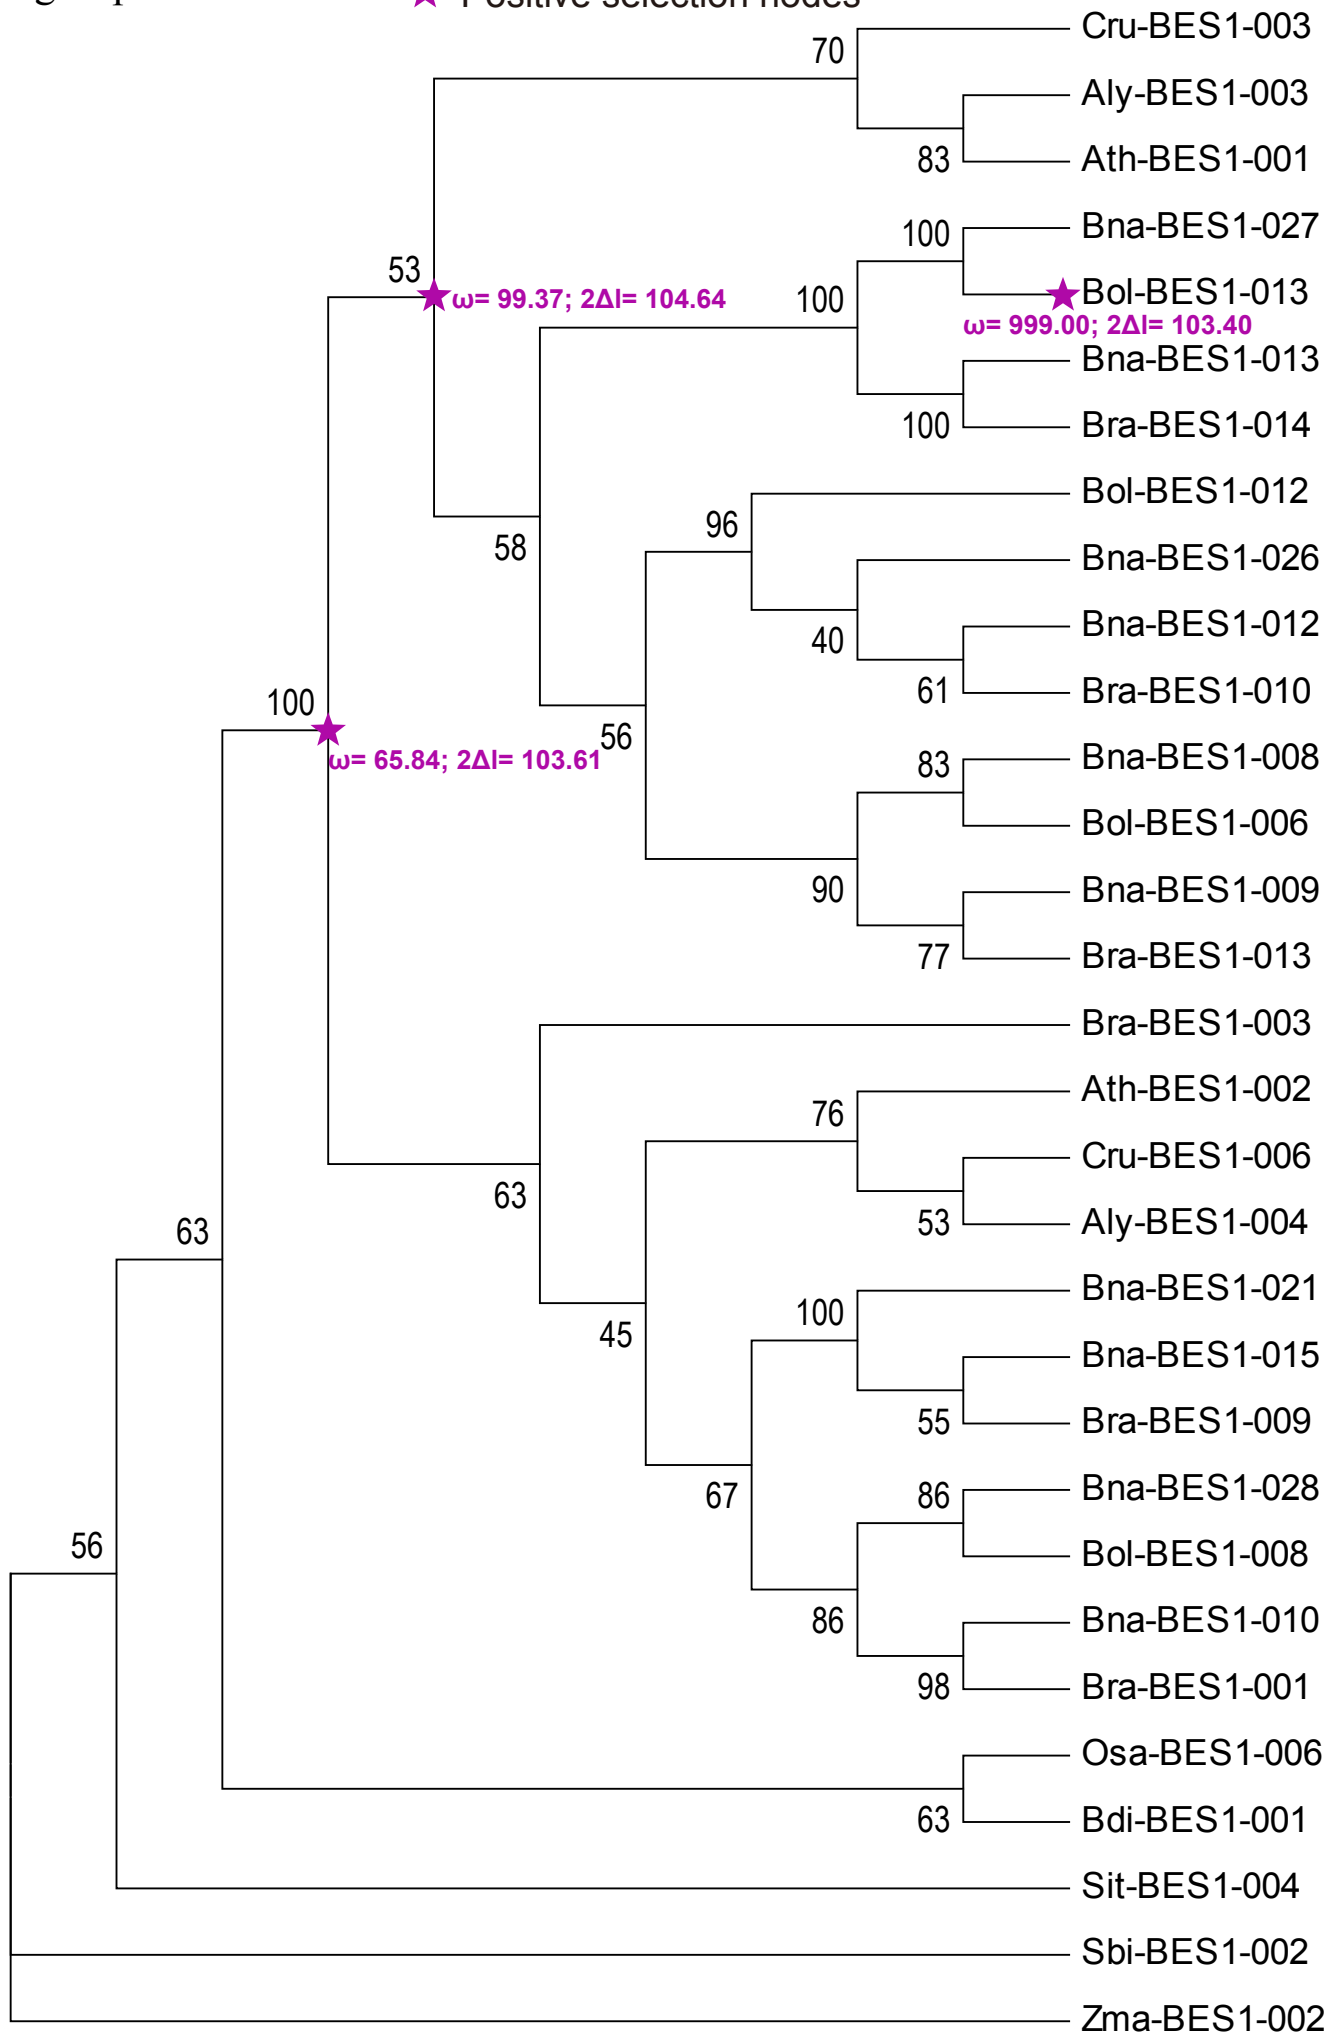

# A2 group

★ Positive selection nodes

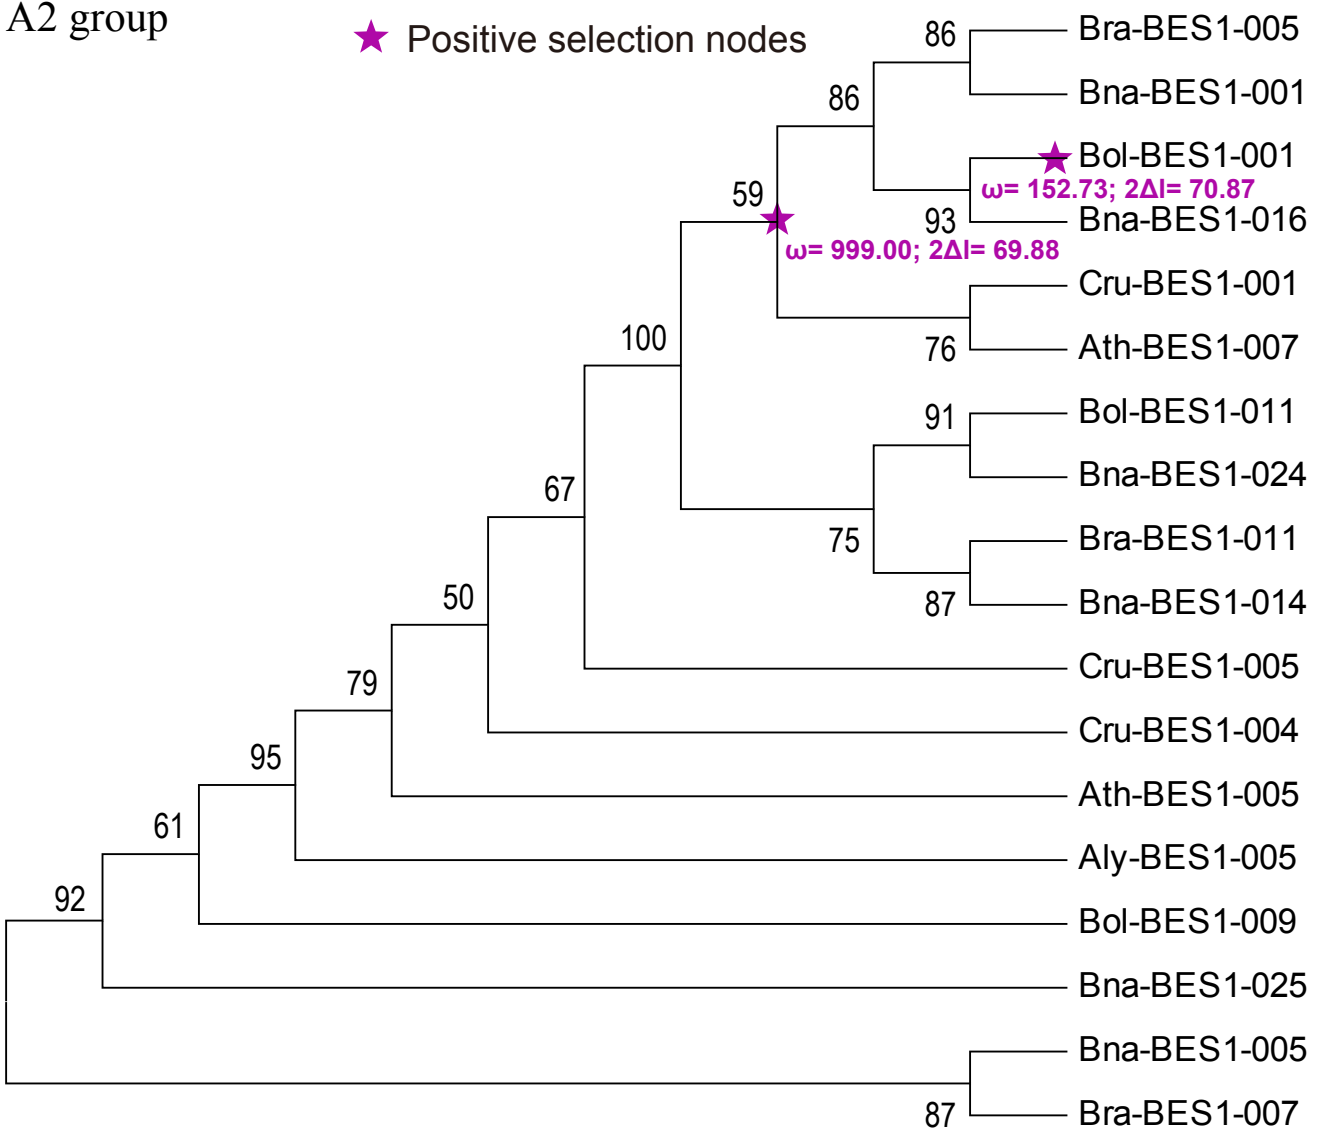

# B1 group

★ Positive selection nodes

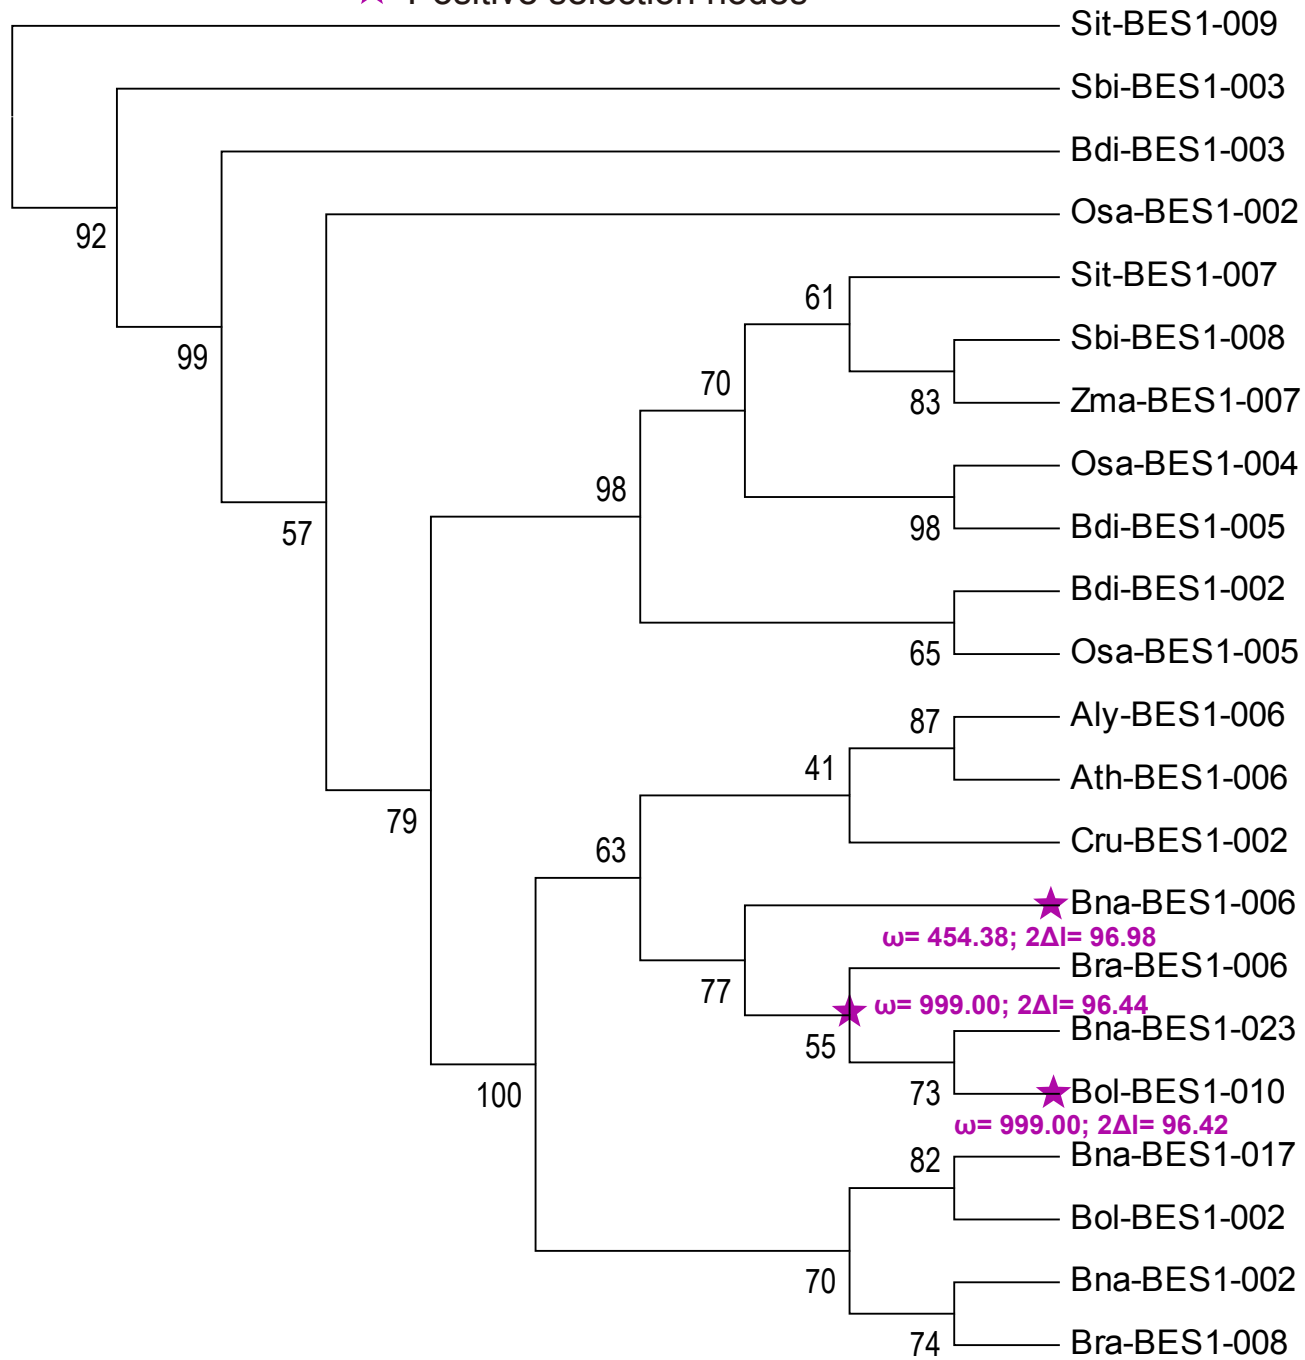

# B2 group

★ Positive selection nodes

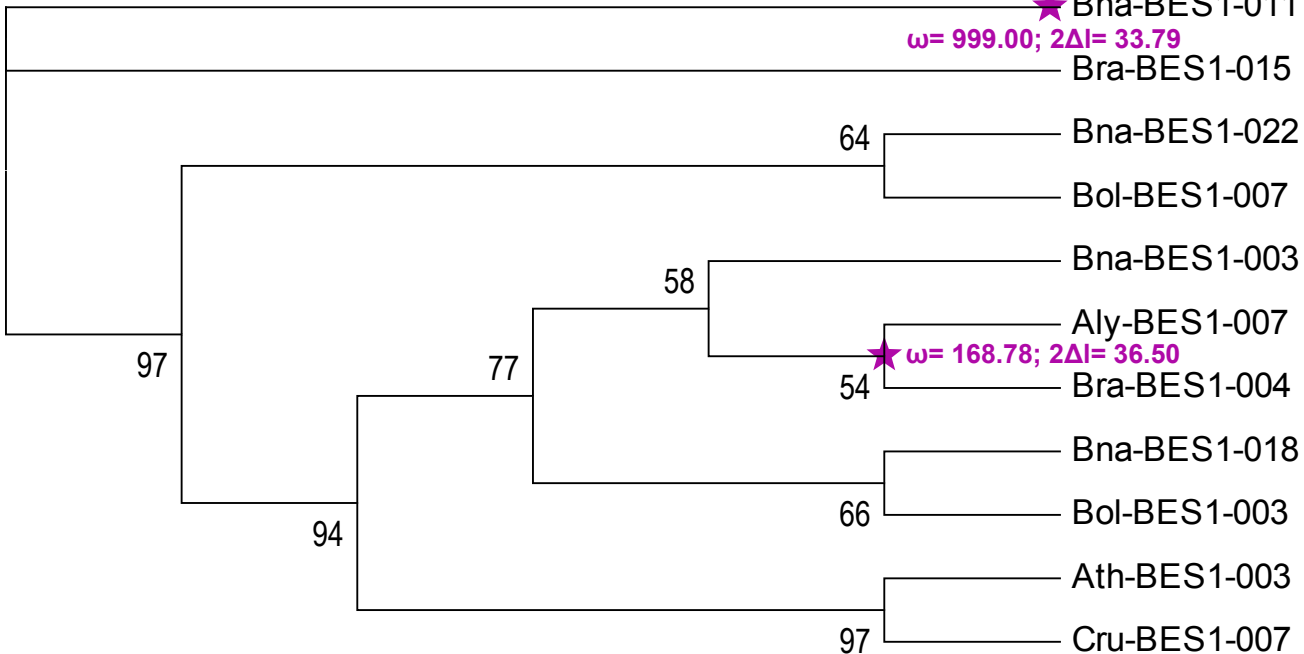

D group

★ Positive selection nodes

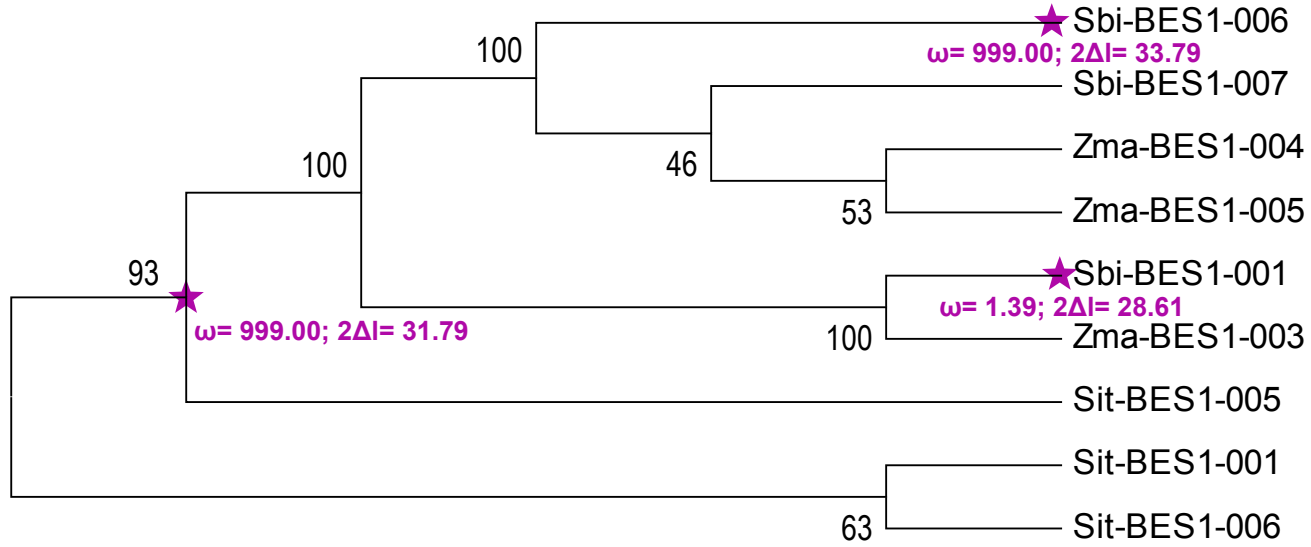

E group

★ Positive selection nodes

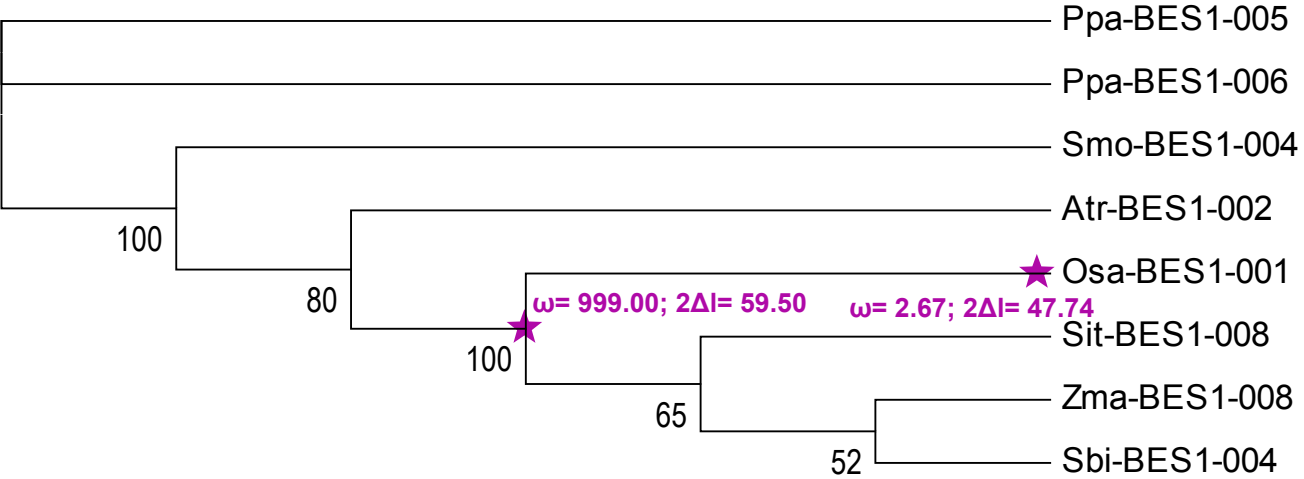

# F1 group

★ Positive selection nodes

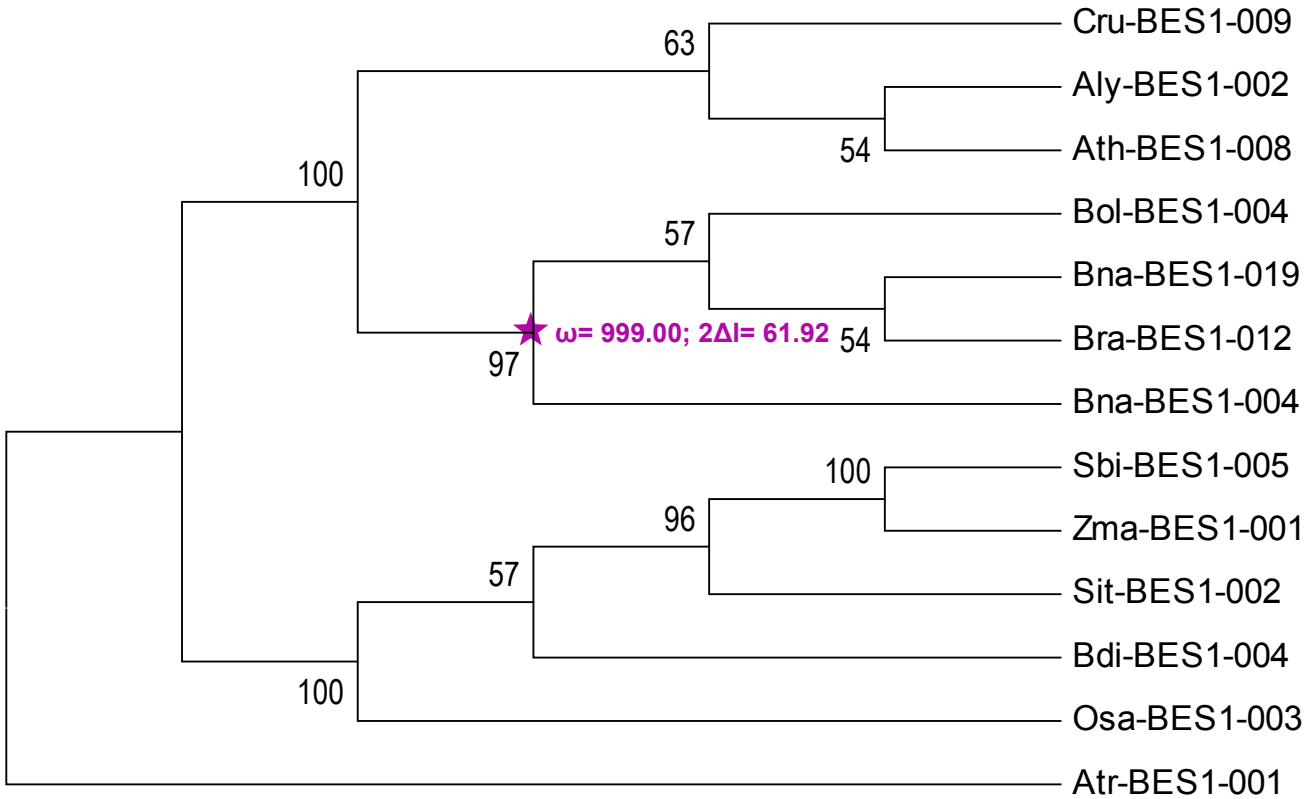



F2 group

★ Positive selection nodes

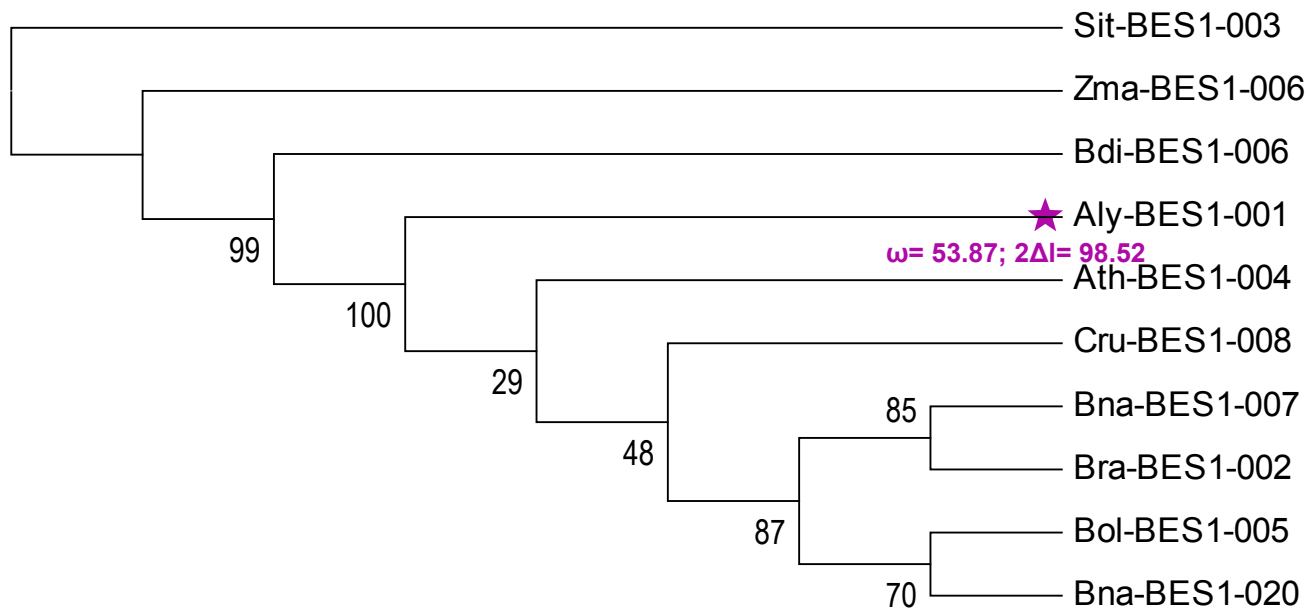

# F3 group

★ Positive selection nodes

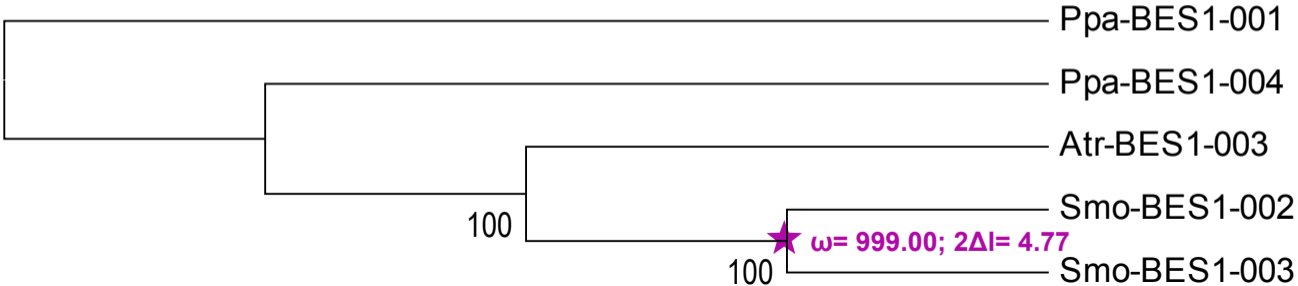

Supplement: 12864_2018_4744_MOESM1_ESM.pdf [file 12864_2018_4744_MOESM1_ESM.pdf]
