# Supplementary material for: Comprehensive analyses of the BES1 gene family in Brassica napus and examination of their evolutionary pattern in representative species
Source: PubMed Central journal article supplement (PMC5944053; doi:10.1186/s12864-018-4744-4), 2018-05-09
Supplement: 12864_2018_4744_MOESM2_ESM.pdf [file 12864_2018_4744_MOESM2_ESM.pdf]

## Supplementary Figure S2-S15

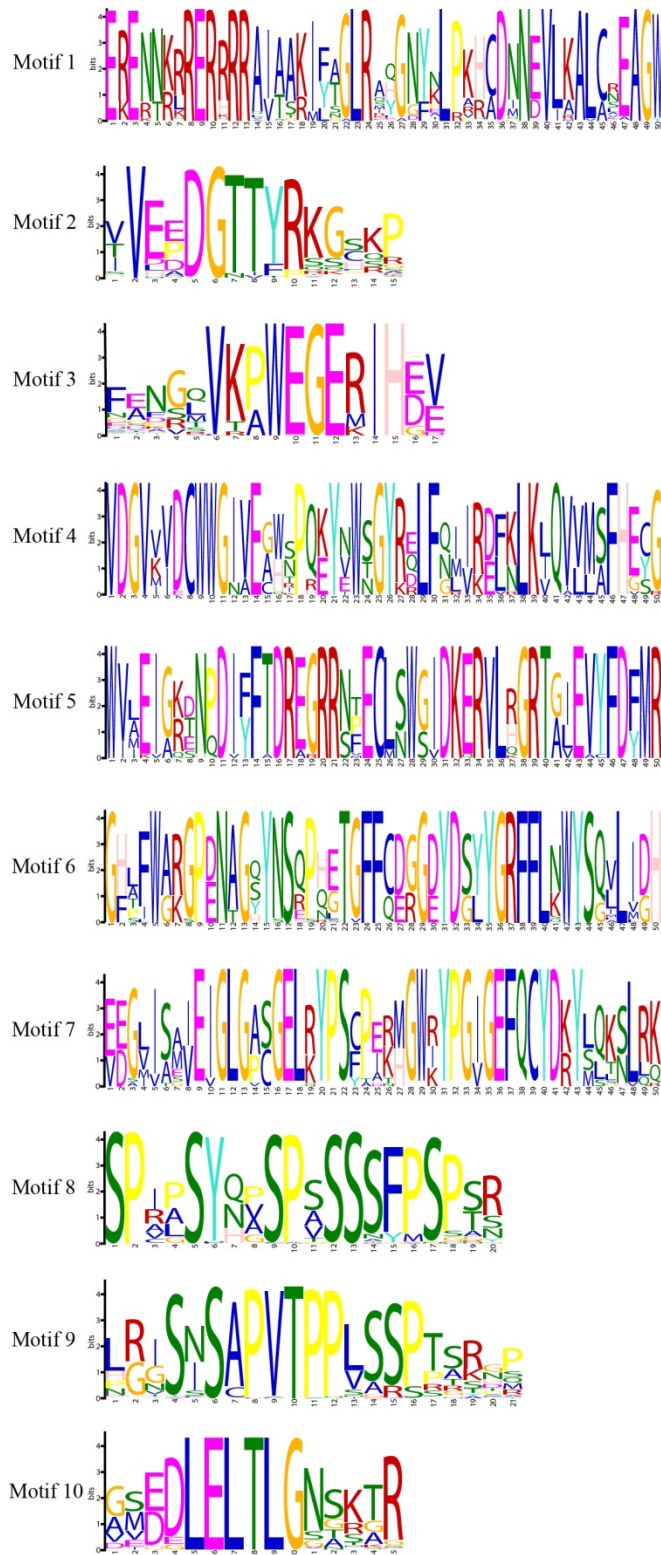

**Figure S2.** The sequences of motif 1 to motif 10 of BES1 gene family among examined species.

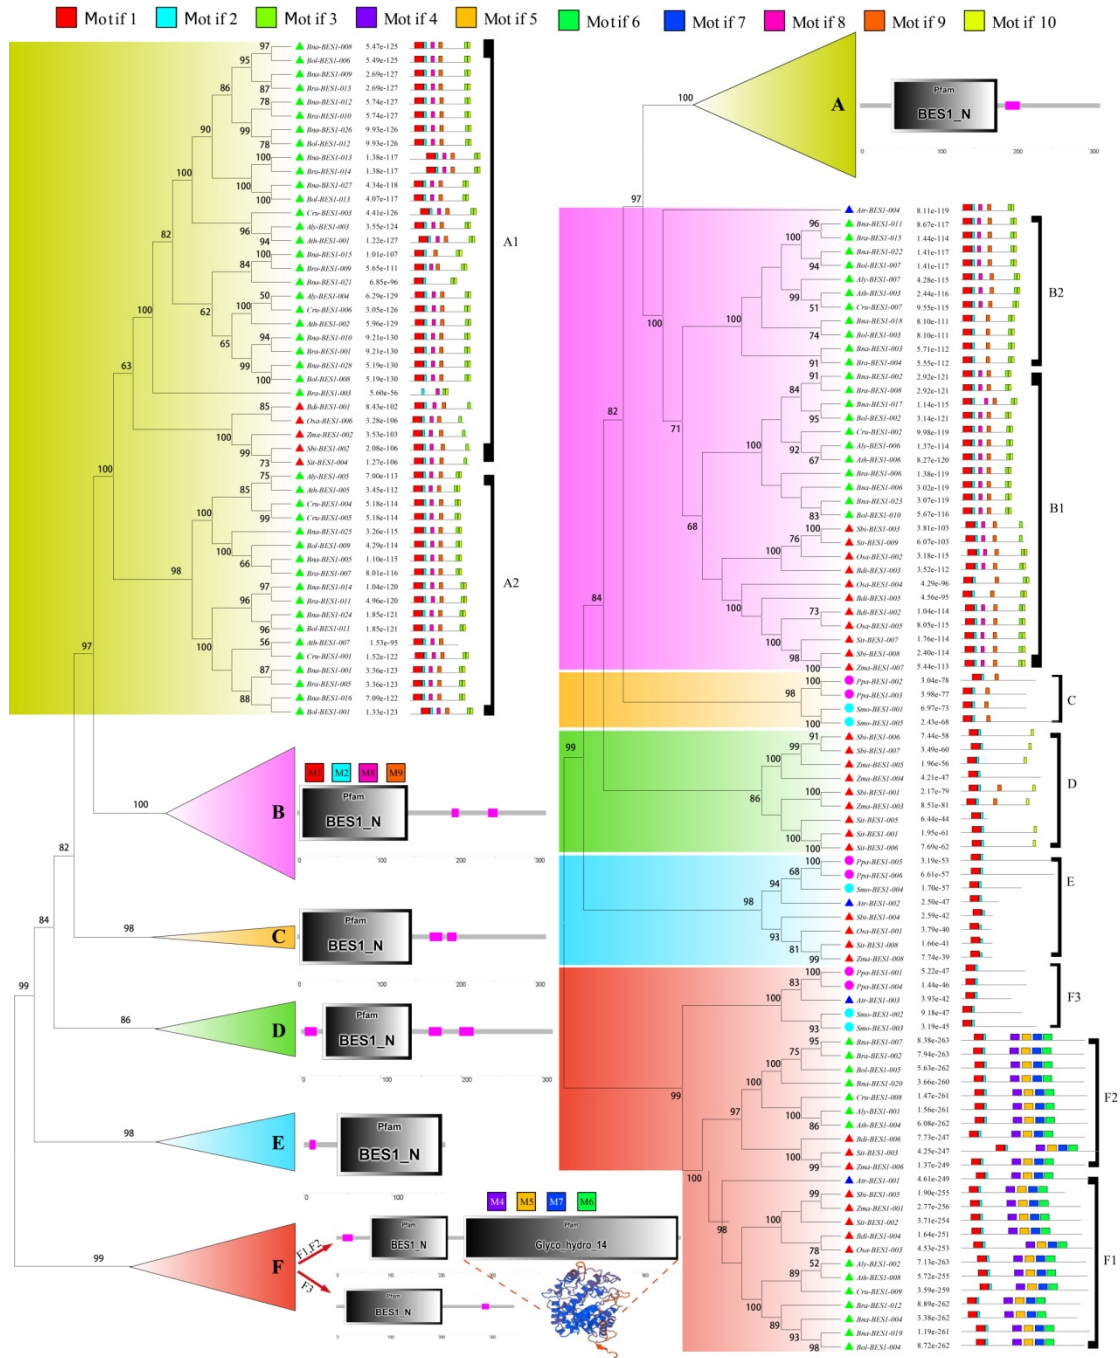

**Figure S3.** The converted motifs (M1 to M10) analyses for each group using the MEME program.



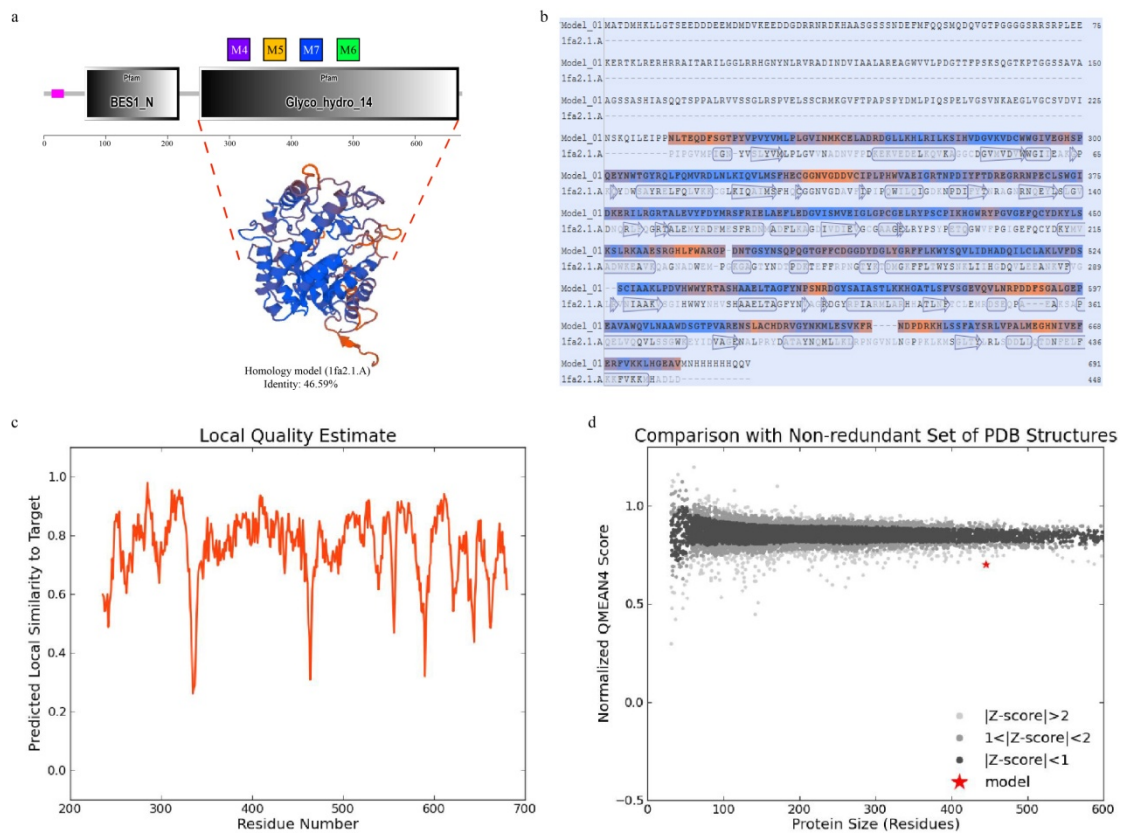

**Figure S5. The analyses of Glyco\_hydro\_14 domain, including (a) protein structure, (b) alignment with the homology model (1fa2.1.A), (c) prediction of local similarity to target, (d) comparison with non-redundant set of PDB structures.**

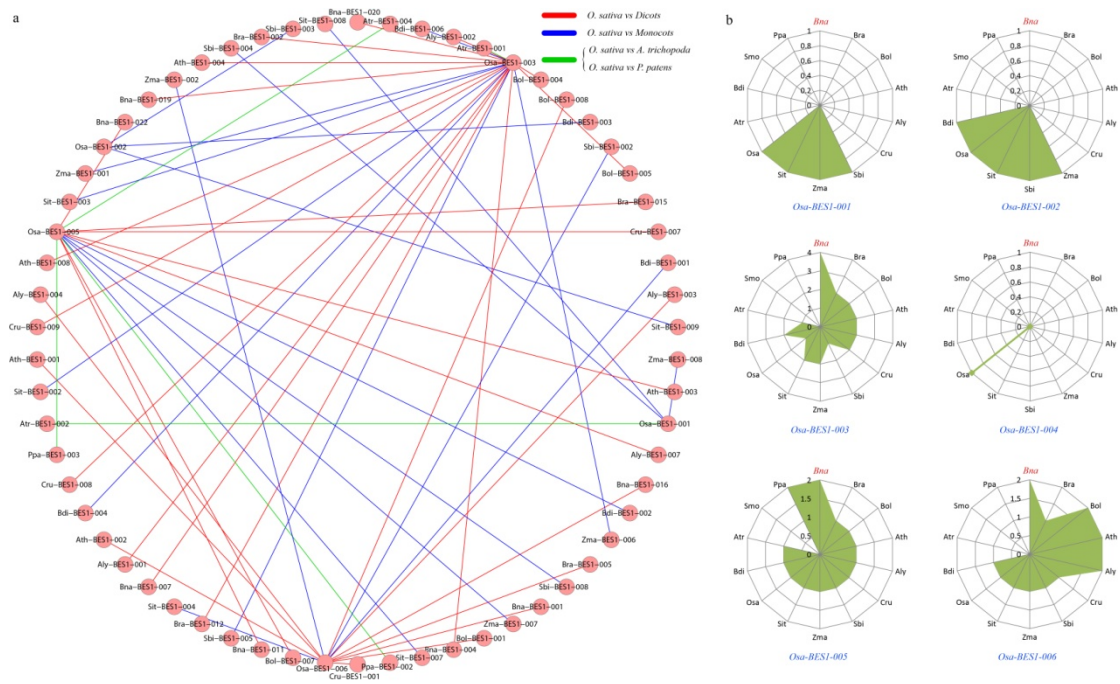

**Figure S6. The analyses of orthologous *BES1* genes between *O. sativa* and other examined species. (a) The interaction network constructed using the orthologous gene pairs between *O. sativa* and other species. (b) The number of orthologous genes in each species with 6 *O. sativa* *BES1* genes.**

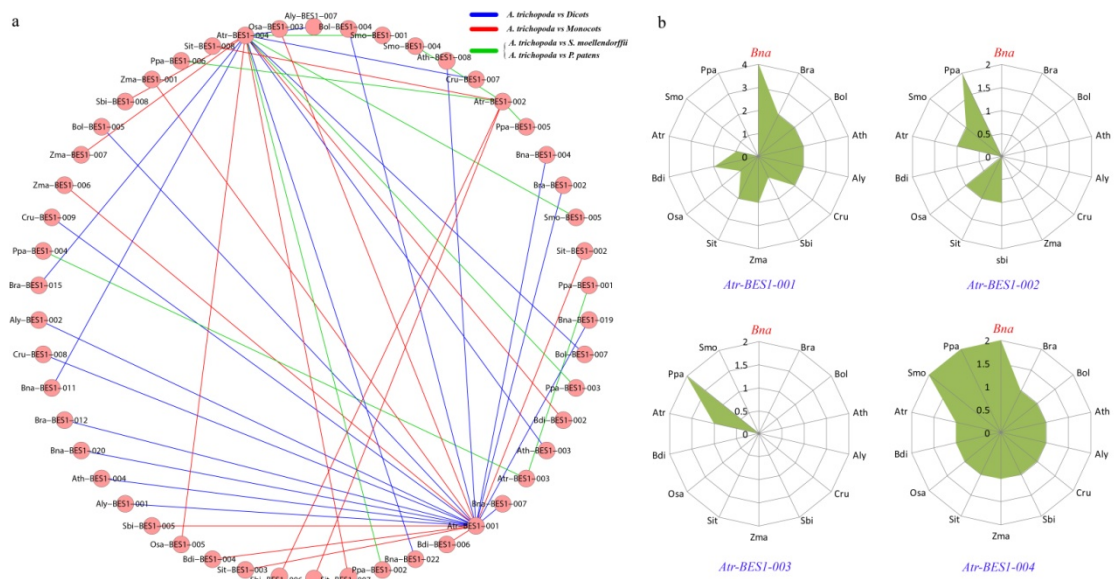

**Figure S7. The analyses of orthologous *BES1* genes between *A. trichopoda* and other examined species. (a) The interaction network constructed using the orthologous gene pairs between *A. trichopoda* and other species. (b) The number of orthologous genes in each species with 4 *A. trichopoda* *BES1* genes.**

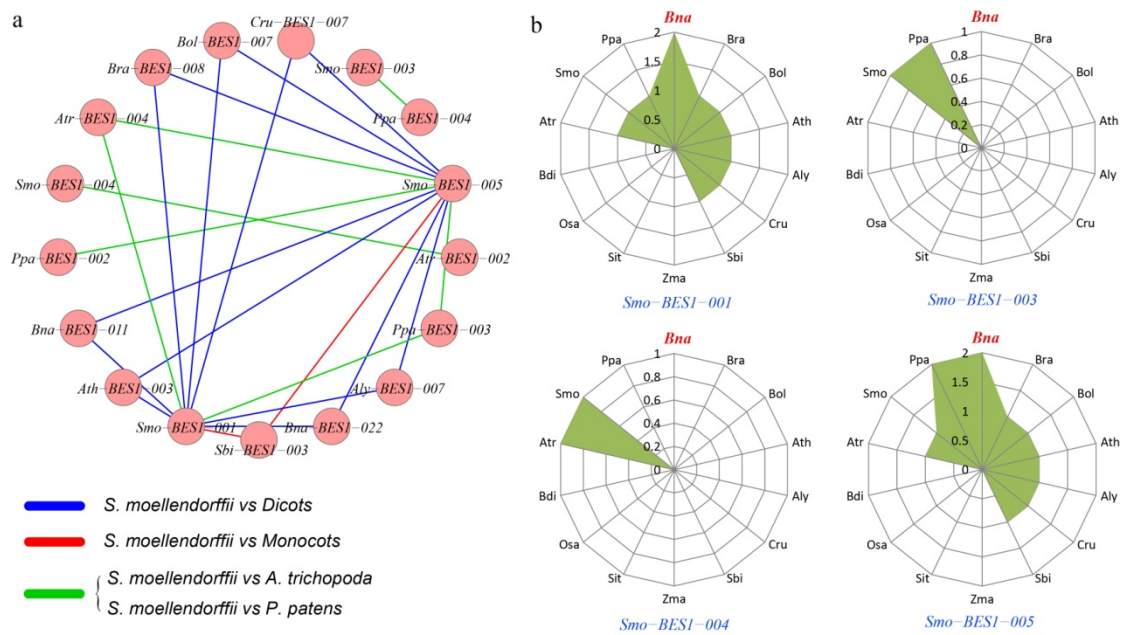

**Figure S8. The analyses of orthologous *BES1* genes between *S. moellendorffii* and other examined species. (a) The interaction network constructed using the orthologous gene pairs between *S. moellendorffii* and other species. (b) The number of orthologous genes in each species with 4 *S. moellendorffii* *BES1* genes.**

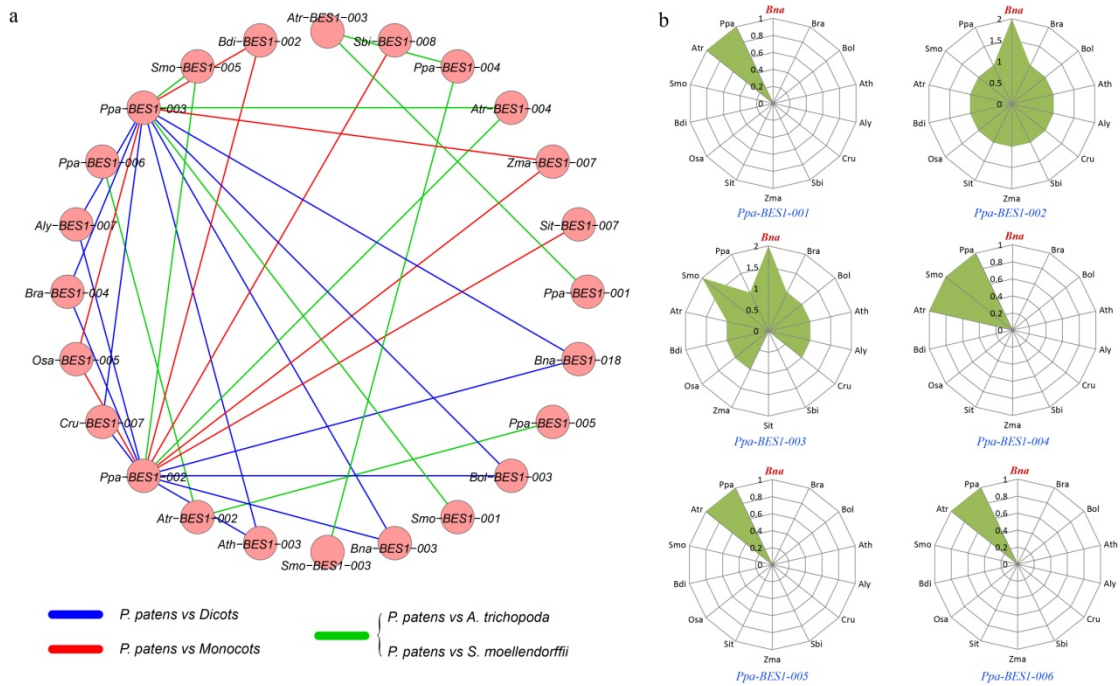

**Figure S9.** The analyses of orthologous *BES1* genes between *P. patens* and other examined species. **(a)** The interaction network constructed using the orthologous gene pairs between *P. patens* and other species. **(b)** The number of orthologous genes in each species with 6 *P. patens* *BES1* genes.





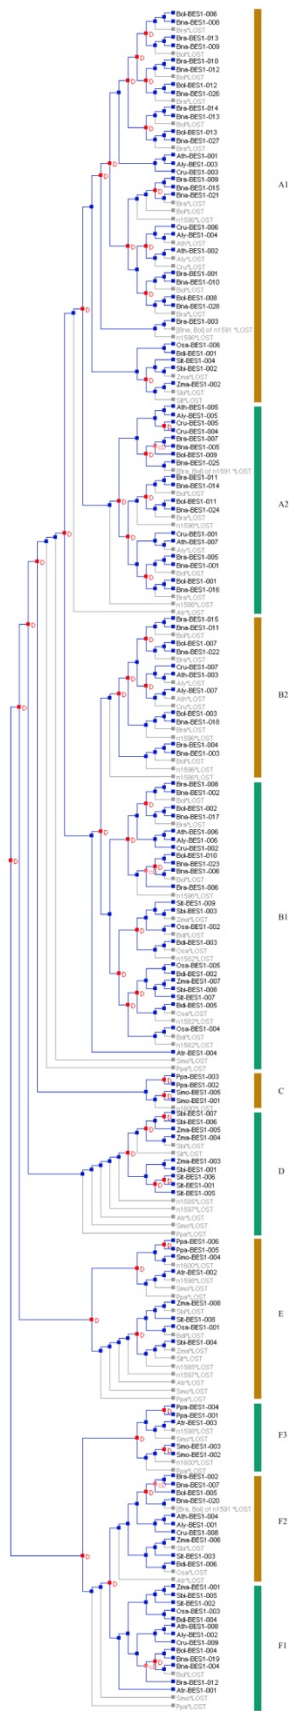

**Figure S11.** The reconstructed phylogenetic tree according to the duplication and losses of *BES1* genes at different stages of plant evolution.

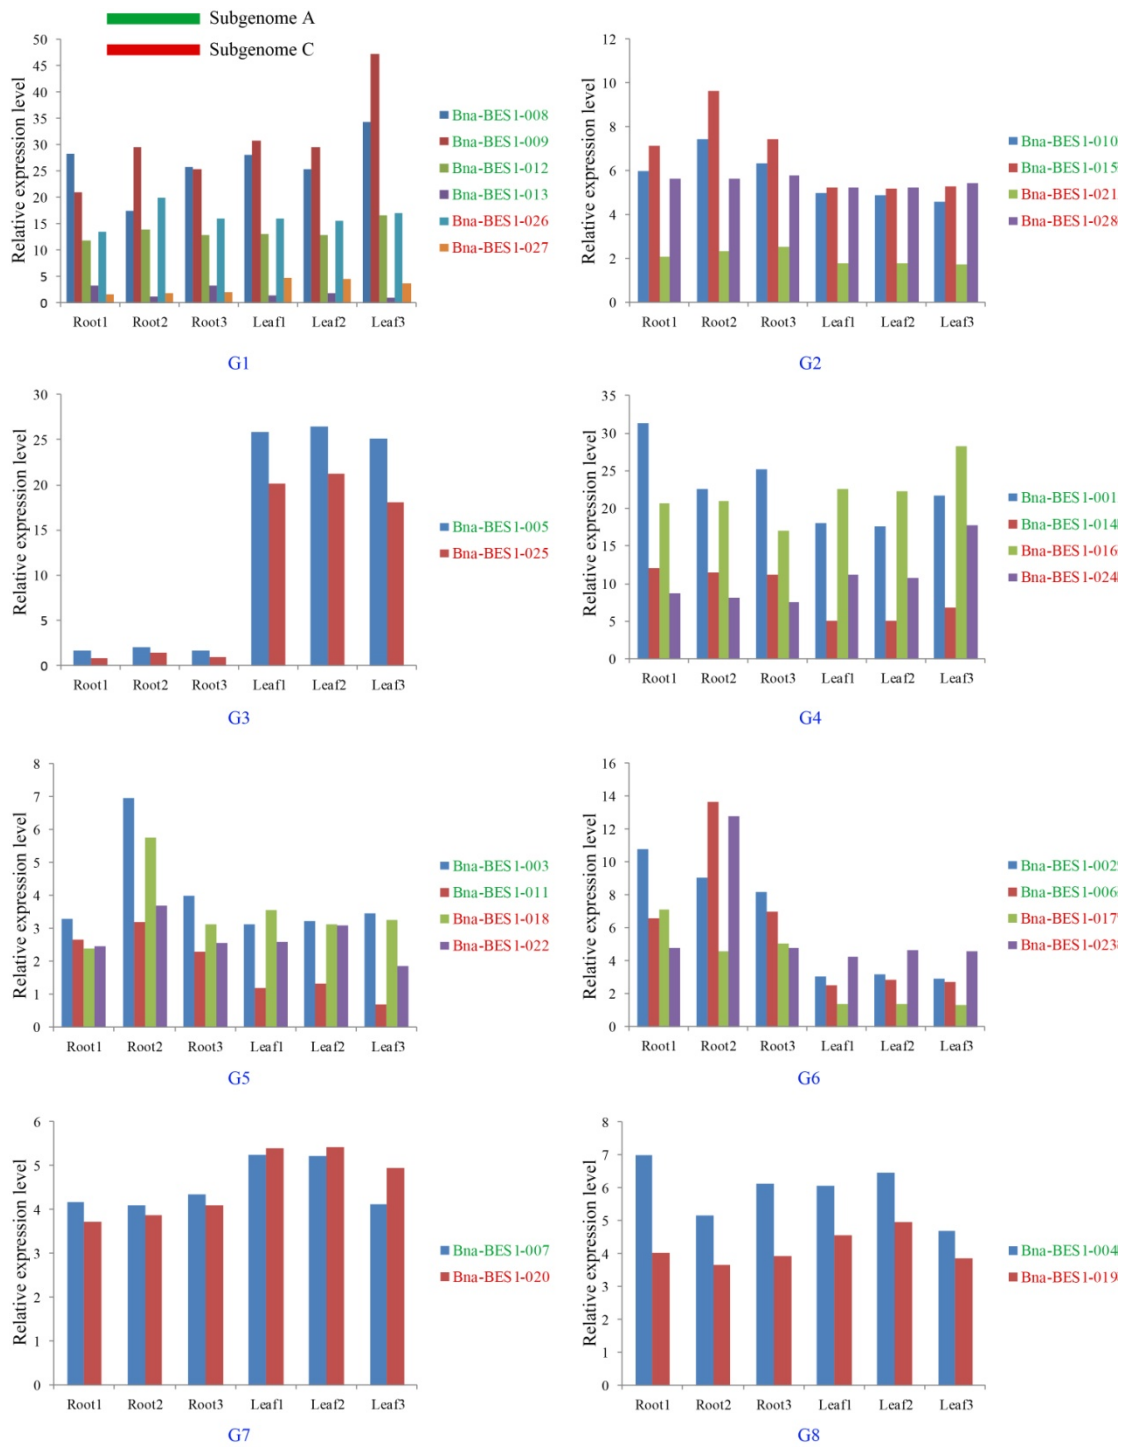

**Figure S12.** The histogram of *BES1* genes expression in root and leaf of *B. napus*. The genes marked with green located subgenome A, and red located subgenome C of *B. napus*.
